# Supplementary material for: Transplantation of mouse HSCs genetically modified to express a CD4-restricted TCR results in long-term immunity that destroys tumors and initiates spontaneous autoimmunity
Source: JCI journal article supplement (doi:10.1172/jci43274), 2010-11-17
Supplement: sd1 [file 1]

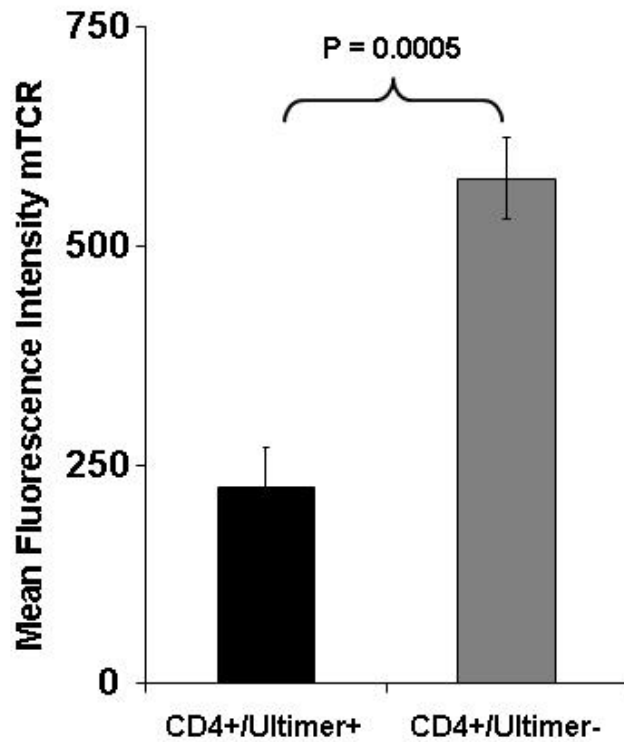

**Supplemental Figure 1**

Density of mTCR $\beta$  expression is lower in the CD4+/Ultimer+ subpopulation. Flow cytometry analysis of PB at 12 months post-transplantation: statistically significant differences in mean fluorescence intensity (MFI) of mTCR $\beta$  expression between CD4+/Ultimer+ and CD4+/Ultimer- subpopulations ( $224 \pm 44$  vs.  $577 \pm 46$ ,  $p = 0.0005$ ) is observed.

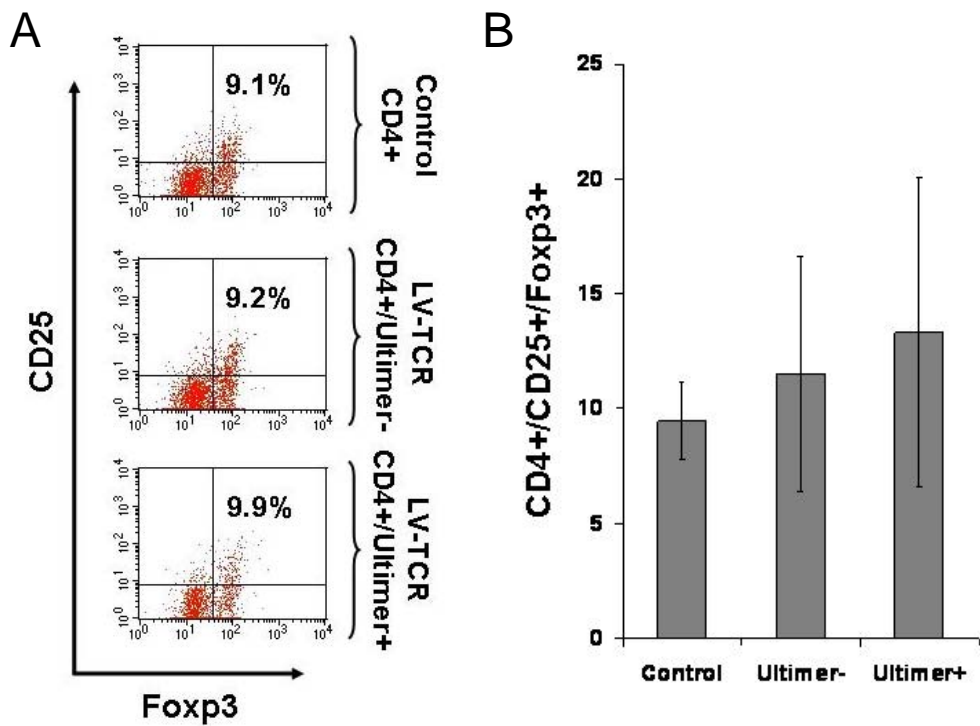

### Supplemental Figure 2

Treg levels are similar between control and LV-TCR transplants. **A**, Splenocytes from both control and LV-TCR transplants at 6 months post-transplantation were obtained and stained with antibodies against CD4, TRP1-Ultimer, CD25 and Foxp3 and analyzed by flow cytometry. **B**, Summary of 6 month Treg levels in control, LV-TCR Ultimer-, LV-TCR Ultimer+ subpopulations. P value is non-significant between groups. Data (mean  $\pm$  SEM;  $n = 4$  per group) and flow cytometry are representative of 2 independent experiments.
